# Supplementary material
Source: ML conference proceedings conference paper supplement (https://aclanthology.org/D18-1464)
Supplement: Attachment [file D18-1464.Attachment.pdf]

## A LSTM Layer

The LSTM layer is defined as follows:

$$\begin{aligned} i_t &= \sigma(W_{ii}e_t + b_{ii} + W_{hi}h_{(t-1)} + b_{hi}), \\ f_t &= \sigma(W_{if}e_t + b_{if} + W_{hf}h_{(t-1)} + b_{hf}), \\ g_t &= \tanh(W_{ig}e_t + b_{ig} + W_{hg}h_{(t-1)} + b_{hg}), \\ o_t &= \sigma(W_{io}e_t + b_{io} + W_{ho}h_{(t-1)} + b_{ho}), \\ c_t &= f_t * c_{(t-1)} + i_t * g_t, \\ h_t &= o_t * \tanh(c_t), \end{aligned}$$

where  $e_t$  is the input word embeddings.

## B Matrix-based Equations

Given the matrix representations of two adjacent sentences (e.g.  $H_i$  and  $H_j$ ), the similarity matrix between LSTM states of these two sentences is defined as follows:

$$SIM = |H_i \cdot H_j^T|,$$

where  $SIM$  is the similarity matrix and  $H_j^T$  is the transpose of matrix  $H_j$ .

$$I_{index}, J_{index} = \text{ARGMAX}(SIM),$$

$$\vec{u}, \vec{v} = H_i[I_{index}], H_j[J_{index}],$$

where the ARGMAX function determines the indices (the row index  $I_{index}$  and the column index  $J_{index}$ ) of the maximum element of the  $SIM$  matrix. These indices point out to word vectors of  $H_i$  and  $H_j$  that are considered for representing the sentence relation.

## C Convolution Layer

A convolution operation involves applying filter  $w$  (i.e. a vector of weight parameters) to the vector of similarities of  $k$  continuity degrees among adjacent sentences in order to encode local transitions of the salient topic:

$$\vec{c} = \tanh(w^T \cdot L_{t:t+k-1} + b_t),$$

where  $L_{t:t+k-1}$  denotes the  $k$  elements in the vector representation of degrees of continuity and  $b_t$  is the bias. Notice that we use a wide convolution, as opposed to narrow, to ensure that the filters reach entire elements of an input vector, including the boundaries. We do this by performing zero-padding, where elements located out of boundaries are assumed to be zero.

## D QWK

To calculate QWK, between two sets of scores, a weight matrix  $W$  is constructed as follows:

$$W_{ij} = \frac{(i-j)^2}{(N-1)^2},$$

where  $i$  is the rating assigned by a human annotator and  $j$  is the rating assigned by a system.  $N$  is the number of possible ratings. A matrix  $O$  is calculated such that  $O_{i,j}$  is the number of essays that receive a rating  $i$  by the human annotator and a rating  $j$  by the system. The last matrix is  $E$  that is calculated by the outer product of the histogram vectors of the human and system ratings. The matrix  $E$  is then normalized such that the sum of the elements in  $E$  and the sum of the elements in  $O$  are the same. QWK is calculated using the matrices  $W$ ,  $O$ , and  $E$  as follows:

$$QWK = 1 - \frac{\sum_{i,j} W_{ij} O_{ij}}{\sum_{i,j} W_{ij} E_{ij}}.$$
